# Supplementary material
Source: publisher site journal article supplement (https://kjim.org/upload/media/kjim-2023-311-Supplementary-Fig-1.pdf)
Supplement: Supplementary file 1 [file kjim-2023-311-Supplementary-Fig-1.pdf]

|                          |     |     | Randomization process | Deviations from intended interventions | Missing outcome data | Measurement of the outcome | Selection of the reported result | Overall bias |   |               |
|--------------------------|-----|-----|-----------------------|----------------------------------------|----------------------|----------------------------|----------------------------------|--------------|---|---------------|
| Ahn et al. (2019)        | BSV | TDF | +                     | +                                      | +                    | +                          | +                                | +            | + | Low risk      |
| Zhao et al. (2019)       | TDF | ETV | ?                     | +                                      | ?                    | +                          | ?                                | ?            | ? | Some concerns |
| Cai et al. (2019)        | TDF | ETV | +                     | +                                      | ?                    | +                          | +                                | !            | ? | High risk     |
| Koike et al. (2018)      | TDF | ETV | +                     | +                                      | ?                    | +                          | ?                                | !            | ? | High risk     |
| Zhang et al. (2017)      | TDF | ETV | +                     | +                                      | ?                    | +                          | ?                                | ?            | ? | High risk     |
| Sriprayoon et al. (2017) | TDF | ETV | ?                     | +                                      | +                    | +                          | ?                                | !            | ! | High risk     |
| Lai et al. (2014)        | BSV | ETV | +                     | +                                      | +                    | +                          | +                                | +            | + | Low risk      |

**Supplementary Figure 1.** Quality and the risk of bias assessment for randomized controlled trials. BSV, besifovir dipivoxil maleate; ETV, entecavir; TAF, tenofovir alafenamide; TDF, tenofovir disoproxil fumarate.
